# Supplementary material for: Breast cancer patients treated with intrathecal therapy for leptomeningeal metastases in a large real-life database
Source: PubMed Central journal article supplement — ESMO Open. 2021 May 10;6(3):100150. doi: 10.1016/j.esmoop.2021.100150 (PMC8134714; doi:10.1016/j.esmoop.2021.100150), 2021-05-10
Supplement: mmc2.pdf [file mmc2.pdf]

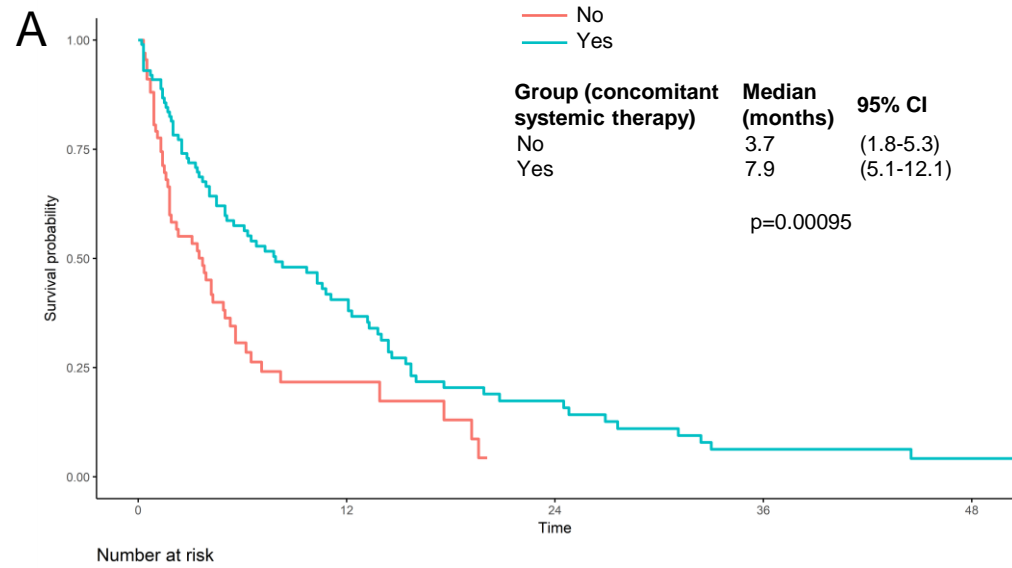

Number at risk

| Time       | 0   | 12 | 24 | 36 | 48 |
|------------|-----|----|----|----|----|
| No (Red)   | 68  | 5  | 0  | 0  | 0  |
| Yes (Teal) | 100 | 32 | 11 | 4  | 2  |

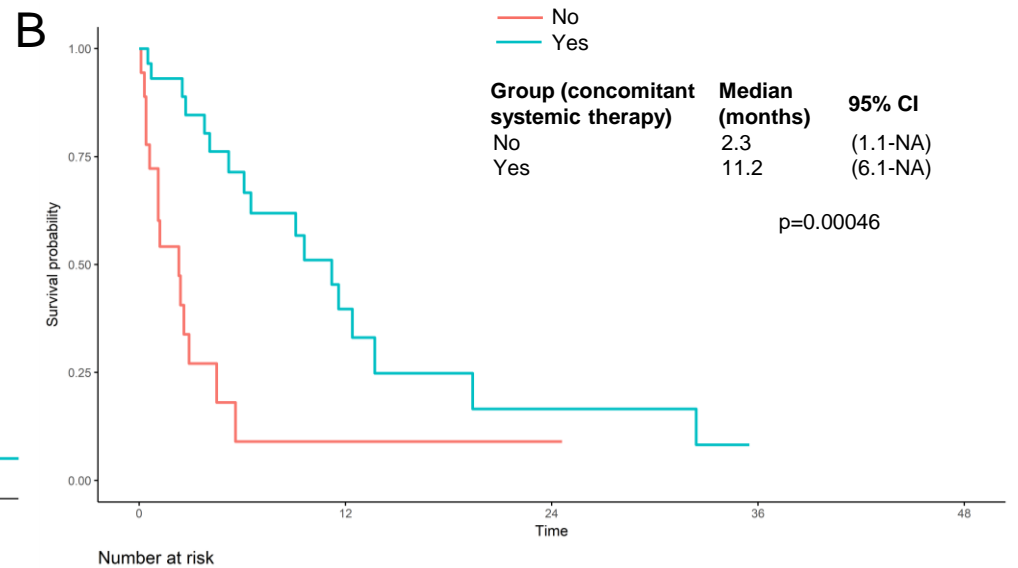

Number at risk

| Time       | 0  | 12 | 24 | 36 | 48 |
|------------|----|----|----|----|----|
| No (Red)   | 18 | 1  | 1  | 0  | 0  |
| Yes (Teal) | 29 | 6  | 2  | 0  | 0  |

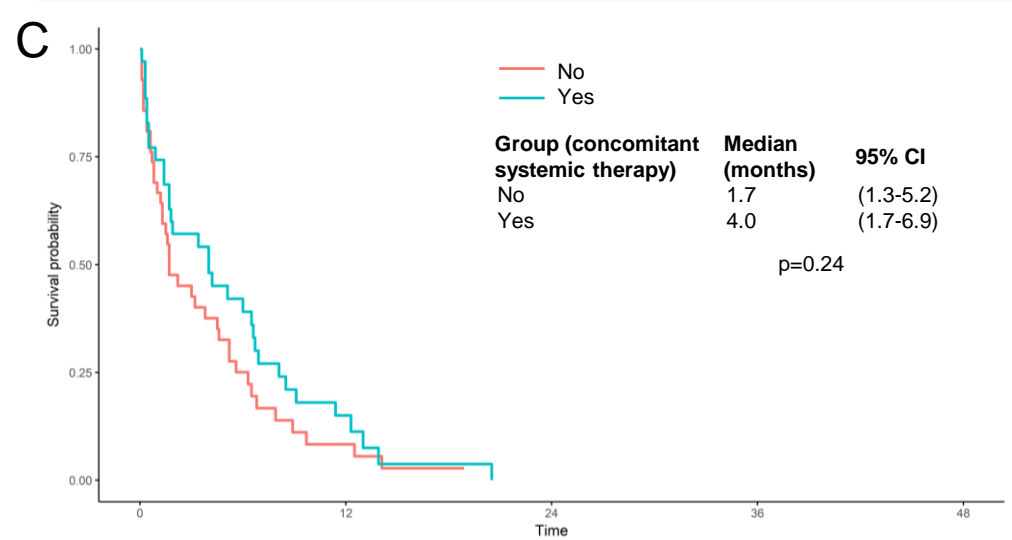

Number at risk

| Time       | 0  | 12 | 24 | 36 | 48 |
|------------|----|----|----|----|----|
| No (Red)   | 42 | 3  | 0  | 0  | 0  |
| Yes (Teal) | 35 | 4  | 0  | 0  | 0  |

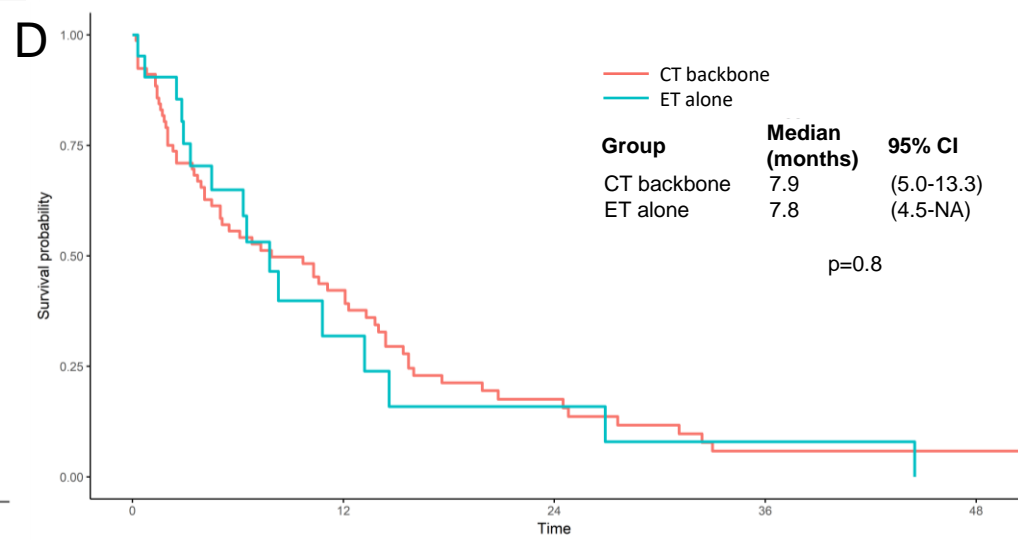

Number at risk

| Time              | 0  | 12 | 24 | 36 | 48 |
|-------------------|----|----|----|----|----|
| CT backbone (Red) | 79 | 28 | 9  | 3  | 2  |
| ET alone (Teal)   | 21 | 4  | 2  | 1  | 0  |
