# Supplementary material for: Breast cancer patients treated with intrathecal therapy for leptomeningeal metastases in a large real-life database
Source: PubMed Central journal article supplement — ESMO Open. 2021 May 10;6(3):100150. doi: 10.1016/j.esmoop.2021.100150 (PMC8134714; doi:10.1016/j.esmoop.2021.100150), 2021-05-10

**A** AUC of ROC for our multivariate model at 1, 3, and 6 months

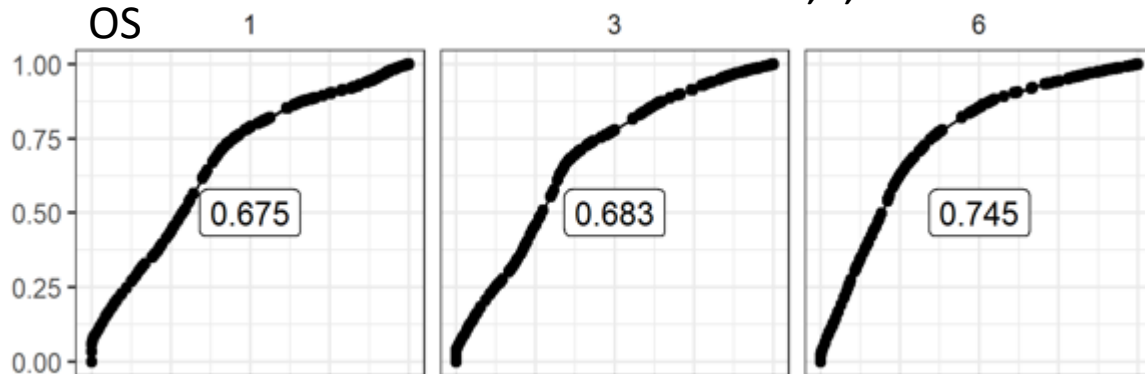

**B** AUC of ROC for Curie score at 1, 3, and 6 months

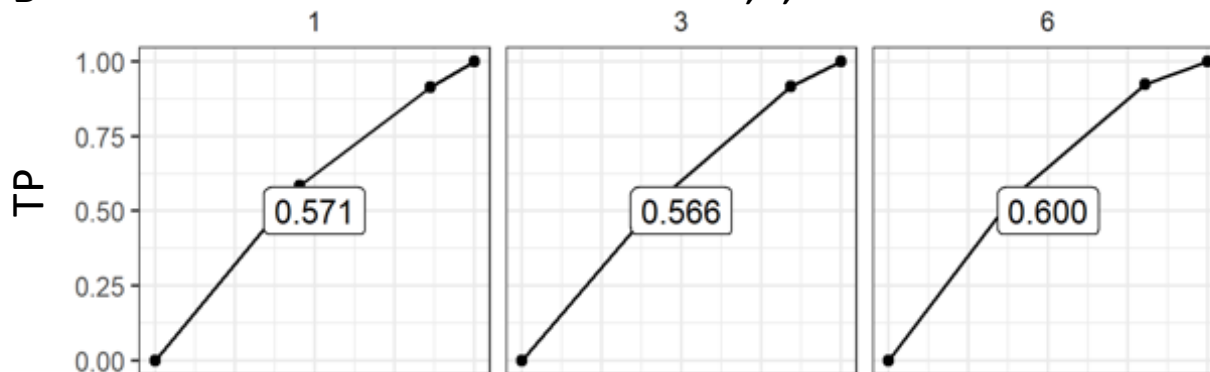

**C** AUC of ROC for Breast-GPA score at 1, 3, and 6 months

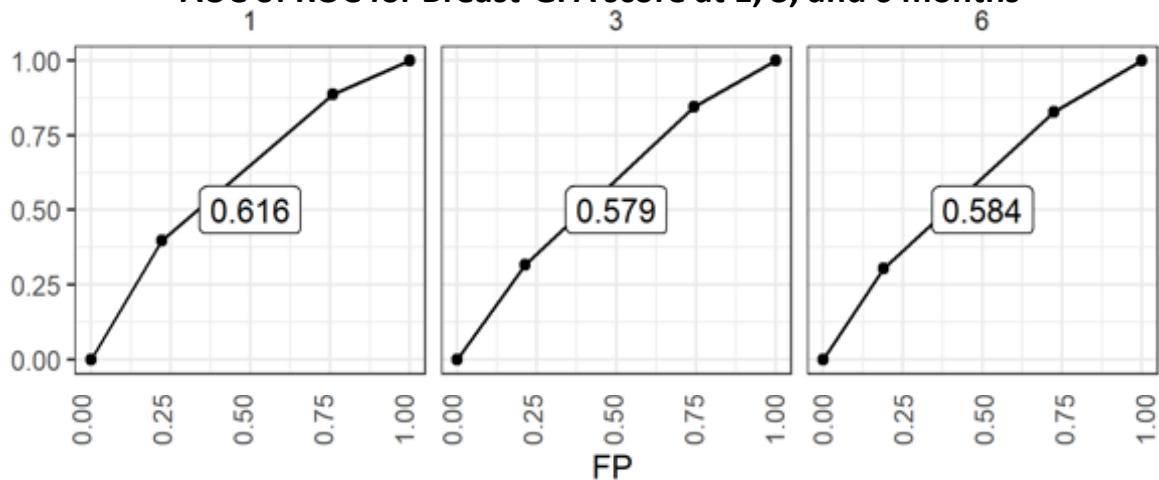

Supplement: mmc3.pdf [file mmc3.pdf]
